# Supplementary material
Source: PubMed Central journal article supplement (PMC2638259)

# Supplemental Figure 1

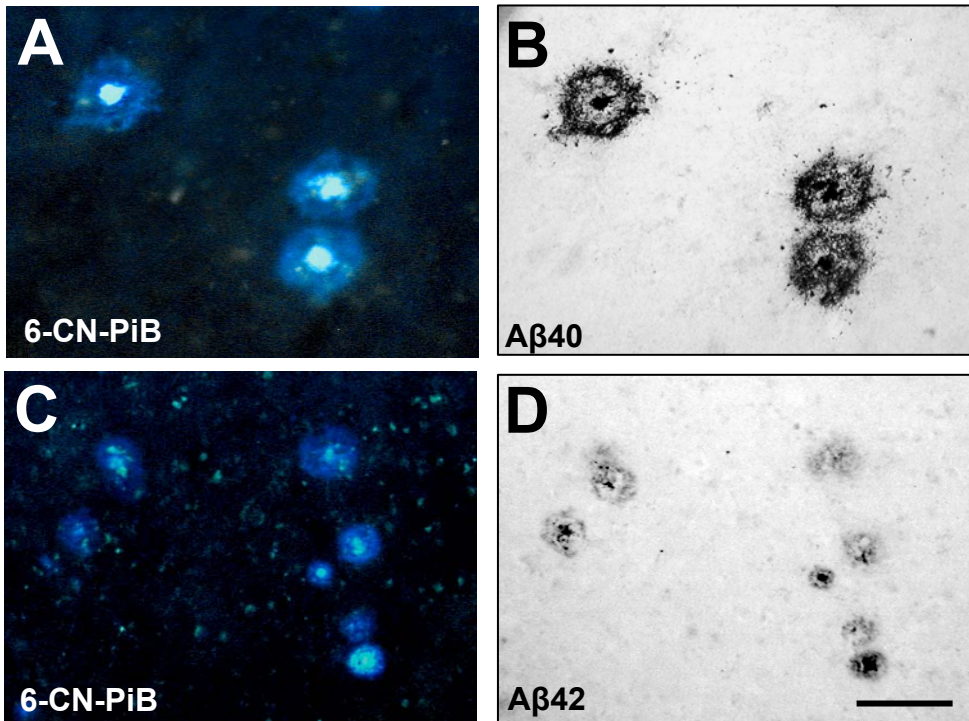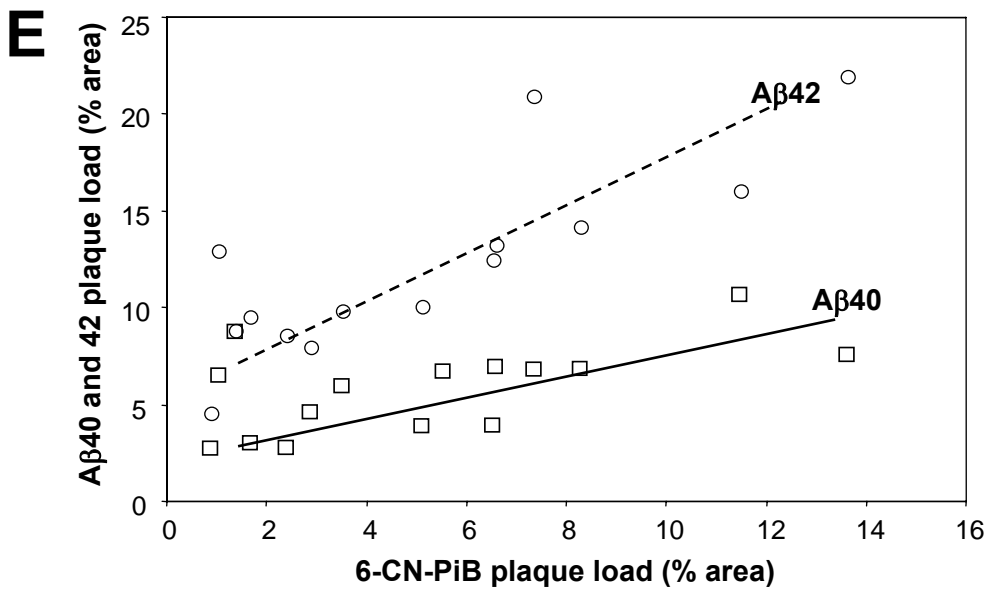

## Supplemental Figure 2

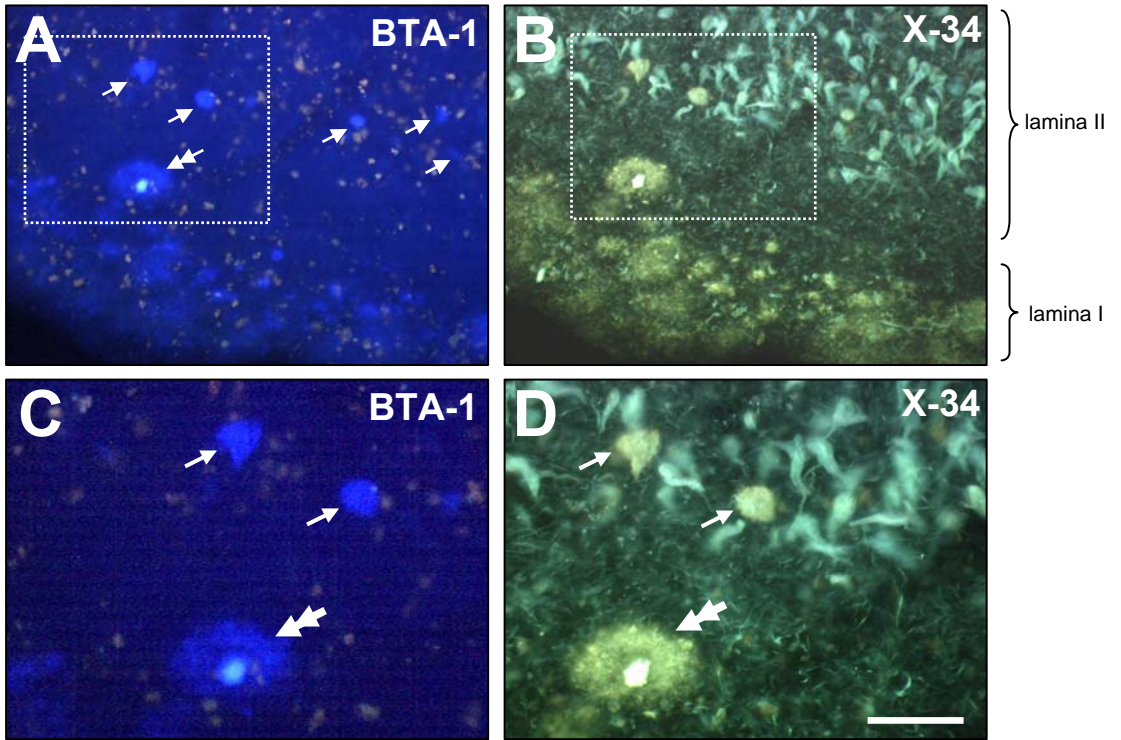

# Supplemental Figure 3

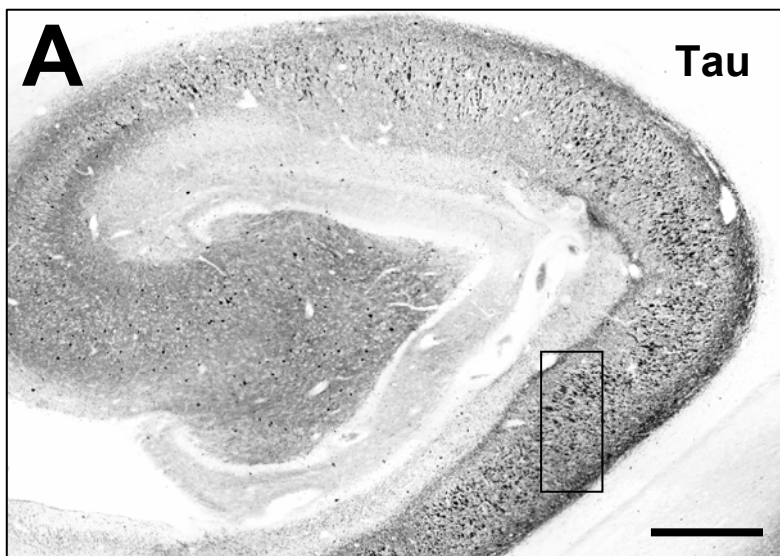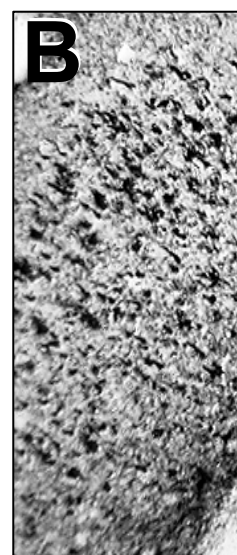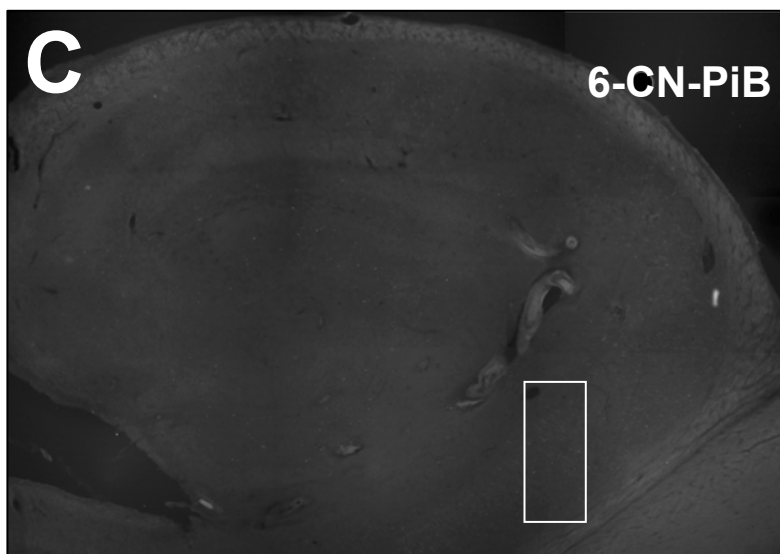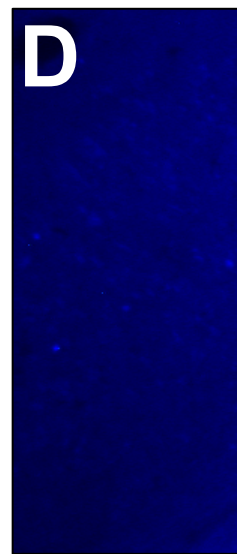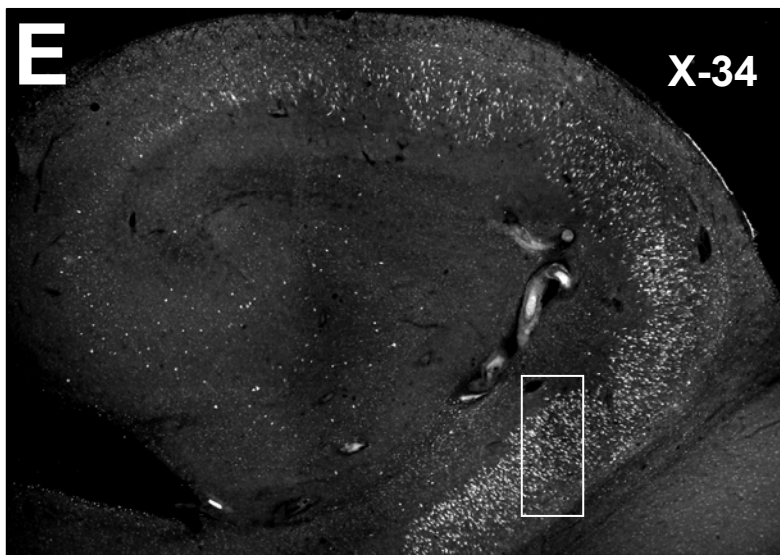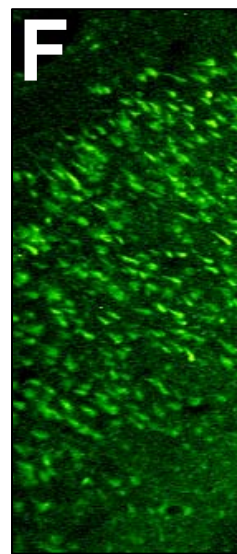

# Supplemental Figure 4

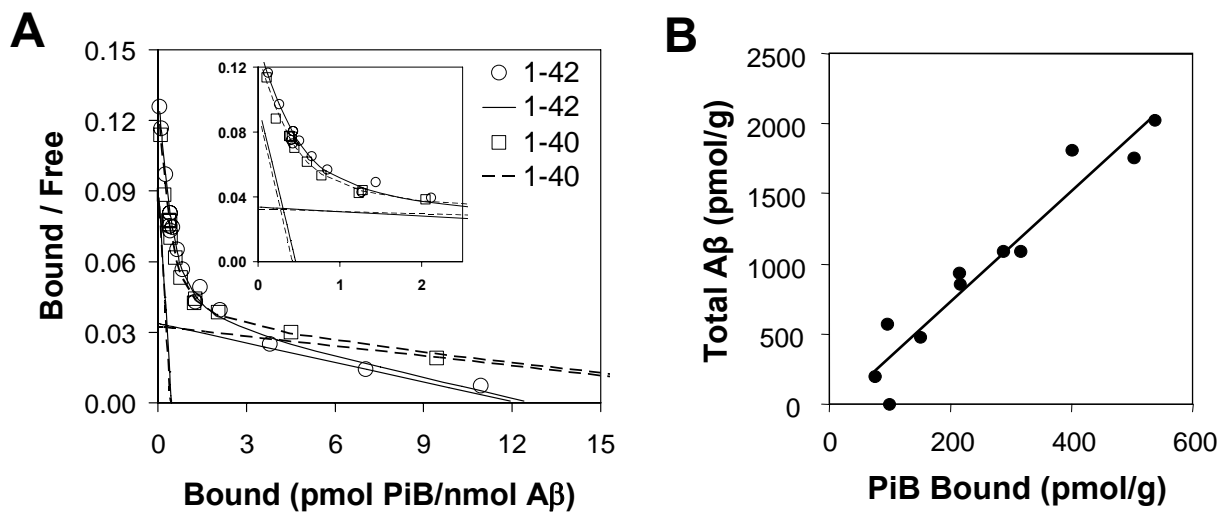

# Supplemental Figure 5

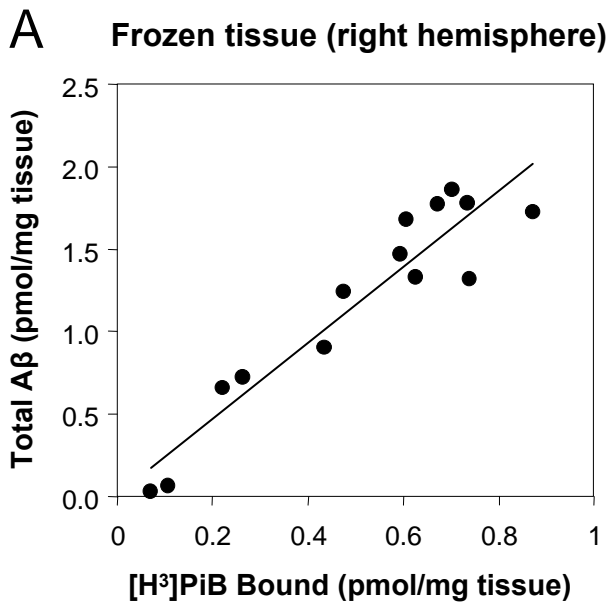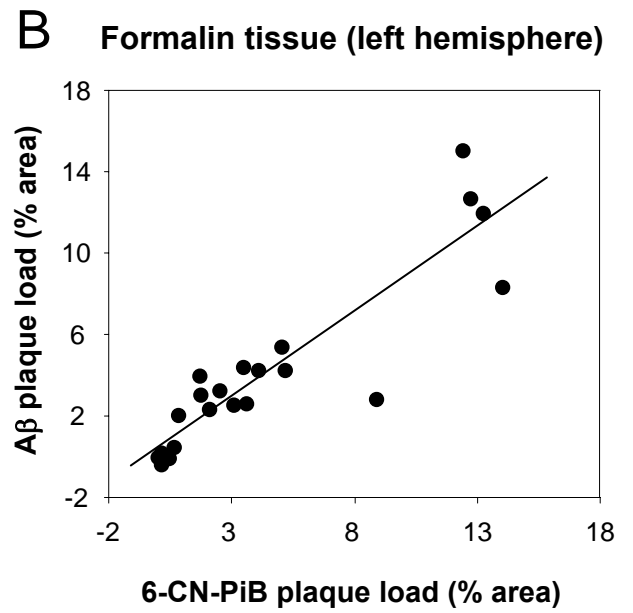

Supplement: awn016_1.pdf [file awn016_1.pdf]
